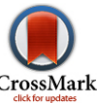

## Correction

# Correction: Trends in Inequalities in Health, Risk and Preventive Behaviour among the Advanced-Age Population in Austria: 1983-2007

The *PLOS ONE* Staff

## Notice of Republication

This article was republished on August 7, 2014, to replace incorrectly changed characters in the byline and citation. The publisher apologizes for the errors. Please download this article again to view the correct version. The originally published, uncorrected article and the republished, corrected article are provided here for reference.

## Supporting Information

**File S1.** Originally published, uncorrected article.  
(PDF)

**File S2.** Republished, corrected article.  
(PDF)

## Reference

1. Muckenhuber J, Fernandez K, Burkert NT, Großschädl F, Freidl W, et al. (2014) Trends in Inequalities in Health, Risk and Preventive Behaviour among the Advanced-Age Population in Austria: 1983-2007. *PLoS ONE* 9(5): e97400. doi:10.1371/journal.pone.0097400

**Citation:** The *PLOS ONE* Staff (2014) Correction: Trends in Inequalities in Health, Risk and Preventive Behaviour among the Advanced-Age Population in Austria: 1983-2007. *PLoS ONE* 9(8): e107084. doi:10.1371/journal.pone.0107084

**Published** August 25, 2014

**Copyright:** © 2014 The *PLOS ONE* Staff. This is an open-access article distributed under the terms of the Creative Commons Attribution License, which permits unrestricted use, distribution, and reproduction in any medium, provided the original author and source are credited.
